# Supplementary material for: Pollutant Gases to Algal Animal Feed: Impacts of Poultry House Exhaust Air on Amino Acid Profile of Algae
Source: MDPI journal article supplement (doi:10.3390/ani14050754), 2024-02-28
Supplement: s1 [file s1]

**Table S1.** The cost calculations of 1 L Bold's Basal Medium

| Chemicals                                                          | The amount used for 1 L BBM (mg/Ld) | Price of each chemicals | Cost Turkish liras (TL) | Cost in Dollars |
|--------------------------------------------------------------------|-------------------------------------|-------------------------|-------------------------|-----------------|
| KHPO <sub>4</sub>                                                  | 175 mg/l                            | 300 TL/1000 g           | 0.053                   | 0.00654         |
| CaCl <sub>2</sub> *2H <sub>2</sub> O                               | 25 mg/l                             | 115.15 TL/1000 g        | 0.003                   | 0.00037         |
| MgSO <sub>4</sub> *7H <sub>2</sub> O                               | 75 mg/l                             | 726.41 TL/1000 g        | 0.054                   | 0.00667         |
| NaNO <sub>3</sub>                                                  | 250 mg/l                            | 751.22 TL/250 g         | 0.75                    | 0.09259         |
| K <sub>2</sub> HPO <sub>4</sub>                                    | 75 mg/l                             | 253.45 TL/100 g         | 0.19                    | 0.02346         |
| MoO <sub>3</sub>                                                   | 1.42 mg/l                           | 902.61 TL /100 g        | 0.013                   | 0.00160         |
| NaCL                                                               | 25 mg/l                             | 31.98 TL/1000 g         | 0.0008                  | 0.00010         |
| EDTA C <sub>10</sub> H <sub>16</sub> N <sub>2</sub> O <sub>8</sub> | 50 mg/l                             | 347 TL/500 g            | 0.035                   | 0.00432         |
| KOH                                                                | 31 mg/l                             | 103.62 TL/1000 g        | 0.0032                  | 0.00040         |
| FeSO <sub>4</sub> *7H <sub>2</sub> O                               | 4.98 mg/l                           | 142.87 TL/1000 g        | 0.0007                  | 0.00009         |
| H <sub>2</sub> SO <sub>4</sub>                                     | 1uL                                 | 130.41 TL/2500 mL       | 0.00005                 | 0.00001         |
| H <sub>3</sub> BO <sub>3</sub>                                     | 11.42 mg/l                          | 179.42 TL/100 g         | 0.02                    | 0.00247         |
| Trace Metal Solution (1 mL/L)                                      | 1 mL                                | 12.95 TL/1000 mL        | 0.013                   | 0.00160         |
| Total cost for 1 L BBM                                             |                                     |                         |                         | 0.140216        |
